# Supplementary material for: Tight nuclear tethering of cGAS is essential for preventing autoreactivity
Source: eLife journal article supplement (doi:10.7554/elife.47491), 2019-12-06
Supplement: supp [file elife-47491-supp-v1.zip]

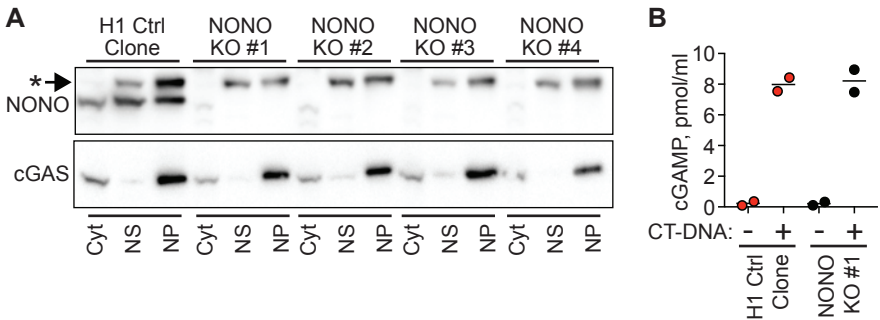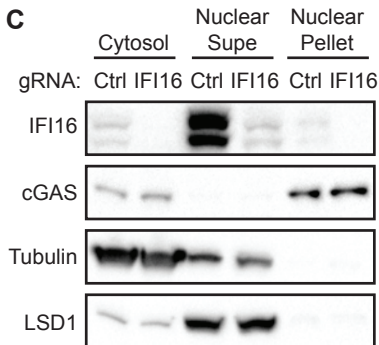

**Figure 4, Figure Supplement 1. NONO and IFI16 are dispensable for cGAS nuclear localization and tethering.**

(A) H1-targeted control HeLa clone and four independent NONO KO HeLa clones were lysed and separated into Cytosol (Cyt), Nuclear supe (NS), and nuclear pellet (NP) fractions, and blotted for NONO and endogenous cGAS. The asterisk indicates a non-specific band detected by the NONO antibody. (B) Cells from (A) were transfected with CT-DNA for four hours, followed by cGAMP measurement in lysates by modified ELISA. (C) TERT-immortalized human fibroblasts were transduced with lentiCRISPR constructs encoding either control gRNA or gRNA targeting *IFI16*, selected with puromycin to enrich for transduced cells, and then fractionated and blotted with the indicated antibodies.
